# Supplementary material for: Eya-controlled affinity between cell lineages drives tissue self-organization during Drosophila oogenesis
Source: PubMed Central journal article supplement (PMC9605976; doi:10.1038/s41467-022-33845-1), 2022-10-26
Supplement: 41467_2022_33845_MOESM13_ESM.pdf [file 41467_2022_33845_MOESM13_ESM.pdf]

## Reporting Summary

Nature Portfolio wishes to improve the reproducibility of the work that we publish. This form provides structure for consistency and transparency in reporting. For further information on Nature Portfolio policies, see our [Editorial Policies](#) and the [Editorial Policy Checklist](#).

### Statistics

For all statistical analyses, confirm that the following items are present in the figure legend, table legend, main text, or Methods section.

- |                                     |                                                                                                                                                                                                                                                                                                |
|-------------------------------------|------------------------------------------------------------------------------------------------------------------------------------------------------------------------------------------------------------------------------------------------------------------------------------------------|
| n/a                                 | Confirmed                                                                                                                                                                                                                                                                                      |
| <input type="checkbox"/>            | <input checked="" type="checkbox"/> The exact sample size ( $n$ ) for each experimental group/condition, given as a discrete number and unit of measurement                                                                                                                                    |
| <input type="checkbox"/>            | <input checked="" type="checkbox"/> A statement on whether measurements were taken from distinct samples or whether the same sample was measured repeatedly                                                                                                                                    |
| <input type="checkbox"/>            | <input checked="" type="checkbox"/> The statistical test(s) used AND whether they are one- or two-sided<br><i>Only common tests should be described solely by name; describe more complex techniques in the Methods section.</i>                                                               |
| <input checked="" type="checkbox"/> | <input type="checkbox"/> A description of all covariates tested                                                                                                                                                                                                                                |
| <input type="checkbox"/>            | <input checked="" type="checkbox"/> A description of any assumptions or corrections, such as tests of normality and adjustment for multiple comparisons                                                                                                                                        |
| <input type="checkbox"/>            | <input checked="" type="checkbox"/> A full description of the statistical parameters including central tendency (e.g. means) or other basic estimates (e.g. regression coefficient) AND variation (e.g. standard deviation) or associated estimates of uncertainty (e.g. confidence intervals) |
| <input type="checkbox"/>            | <input checked="" type="checkbox"/> For null hypothesis testing, the test statistic (e.g. $F$ , $t$ , $r$ ) with confidence intervals, effect sizes, degrees of freedom and $P$ value noted<br><i>Give <math>P</math> values as exact values whenever suitable.</i>                            |
| <input checked="" type="checkbox"/> | <input type="checkbox"/> For Bayesian analysis, information on the choice of priors and Markov chain Monte Carlo settings                                                                                                                                                                      |
| <input checked="" type="checkbox"/> | <input type="checkbox"/> For hierarchical and complex designs, identification of the appropriate level for tests and full reporting of outcomes                                                                                                                                                |
| <input checked="" type="checkbox"/> | <input type="checkbox"/> Estimates of effect sizes (e.g. Cohen's $d$ , Pearson's $r$ ), indicating how they were calculated                                                                                                                                                                    |

*Our web collection on [statistics for biologists](#) contains articles on many of the points above.*

### Software and code

Policy information about [availability of computer code](#)

Data collection

Data analysis

For manuscripts utilizing custom algorithms or software that are central to the research but not yet described in published literature, software must be made available to editors and reviewers. We strongly encourage code deposition in a community repository (e.g. GitHub). See the Nature Portfolio [guidelines for submitting code & software](#) for further information.

### Data

Policy information about [availability of data](#)

All manuscripts must include a [data availability statement](#). This statement should provide the following information, where applicable:

- Accession codes, unique identifiers, or web links for publicly available datasets
- A description of any restrictions on data availability
- For clinical datasets or third party data, please ensure that the statement adheres to our [policy](#)

## Human research participants

Policy information about [studies involving human research participants and Sex and Gender in Research](#).

|                             |                                             |
|-----------------------------|---------------------------------------------|
| Reporting on sex and gender | <input type="text" value="not applicable"/> |
| Population characteristics  | <input type="text" value="not applicable"/> |
| Recruitment                 | <input type="text" value="not applicable"/> |
| Ethics oversight            | <input type="text" value="not applicable"/> |

Note that full information on the approval of the study protocol must also be provided in the manuscript.

## Field-specific reporting

Please select the one below that is the best fit for your research. If you are not sure, read the appropriate sections before making your selection.

Life sciences       Behavioural & social sciences       Ecological, evolutionary & environmental sciences

For a reference copy of the document with all sections, see [nature.com/documents/nr-reporting-summary-flat.pdf](https://www.nature.com/documents/nr-reporting-summary-flat.pdf)

## Life sciences study design

All studies must disclose on these points even when the disclosure is negative.

|                 |                                                                                                                                                                                                                                                                                                                |
|-----------------|----------------------------------------------------------------------------------------------------------------------------------------------------------------------------------------------------------------------------------------------------------------------------------------------------------------|
| Sample size     | <input and="" reproducibility="" statistics"."="" type="text" value="Sample size was chosen to cover developmental processes sufficiently and to provide a reliable sample size for statistical analysis. Sample sizes vary dependent on the experiment and statistical analysis. For details see the file "/> |
| Data exclusions | <input type="text" value="Data were only excluded if proper sample preparation for microscopy failed."/>                                                                                                                                                                                                       |
| Replication     | <input type="text" value="To confirm reproducibility of our data, we performed each experiment at least 5 times independently and found no problem with reproducibility."/>                                                                                                                                    |
| Randomization   | <input type="text" value="Due to genetic experiments rather than experiments based on treatments, randomization is not applicable."/>                                                                                                                                                                          |
| Blinding        | <input type="text" value="Blinding was not necessary as the quantification of data was based on defined and extensive objective morphological measurements."/>                                                                                                                                                 |

## Reporting for specific materials, systems and methods

We require information from authors about some types of materials, experimental systems and methods used in many studies. Here, indicate whether each material, system or method listed is relevant to your study. If you are not sure if a list item applies to your research, read the appropriate section before selecting a response.

### Materials & experimental systems

| n/a                                 | Involved in the study                                           |
|-------------------------------------|-----------------------------------------------------------------|
| <input type="checkbox"/>            | <input checked="" type="checkbox"/> Antibodies                  |
| <input checked="" type="checkbox"/> | <input type="checkbox"/> Eukaryotic cell lines                  |
| <input checked="" type="checkbox"/> | <input type="checkbox"/> Palaeontology and archaeology          |
| <input type="checkbox"/>            | <input checked="" type="checkbox"/> Animals and other organisms |
| <input checked="" type="checkbox"/> | <input type="checkbox"/> Clinical data                          |
| <input checked="" type="checkbox"/> | <input type="checkbox"/> Dual use research of concern           |

### Methods

| n/a                                 | Involved in the study                           |
|-------------------------------------|-------------------------------------------------|
| <input checked="" type="checkbox"/> | <input type="checkbox"/> ChIP-seq               |
| <input checked="" type="checkbox"/> | <input type="checkbox"/> Flow cytometry         |
| <input checked="" type="checkbox"/> | <input type="checkbox"/> MRI-based neuroimaging |

## Antibodies

|                 |                                                                                                                                                                                                                                                                                                                                                                                                                                                                                                                                                                                                                                                                                                                                                                                                                    |
|-----------------|--------------------------------------------------------------------------------------------------------------------------------------------------------------------------------------------------------------------------------------------------------------------------------------------------------------------------------------------------------------------------------------------------------------------------------------------------------------------------------------------------------------------------------------------------------------------------------------------------------------------------------------------------------------------------------------------------------------------------------------------------------------------------------------------------------------------|
| Antibodies used | <input type="text" value="mouse anti-β-catenin (1:100, DSHB, N27A1), rat anti-E-cadherin (1:50, DSHB, DCAD2), rabbit anti-GFP (1:200, Thermo Fisher, G10362), rat anti-RFP (1:20, gift from H. Leonhardt, Chromotek 5F8), mouse anti-β-gal (1:1000, Promega Z378B), mouse anti-Eya (1:100, DSHB eya10H6), rabbit anti-pMad (1:200, abcam ab52903), DAPI (0.25ng/μl, Sigma), Phalloidin (Alexa Fluor 488, Alexa Fluor 647 and Alexa Fluor 555, Molecular Probes, or Phalloidin-TRITC, Sigma), goat anti-mouse Alexa Fluor488 (Abcam, AB150117, 1:500), goat anti-rat Alexa Fluor488 (Abcam, AB150153, 1:500), goat anti-rabbit Alexa Fluor488 (Invitrogen, A11008, 1:500), donkey anti-mouse Alexa Fluor555 (Abcam, AB150110, 1:500), donkey anti-rat Alexa Fluor555 (Abcam, AB150154, 1:500), donkey anti-mouse"/> |
|-----------------|--------------------------------------------------------------------------------------------------------------------------------------------------------------------------------------------------------------------------------------------------------------------------------------------------------------------------------------------------------------------------------------------------------------------------------------------------------------------------------------------------------------------------------------------------------------------------------------------------------------------------------------------------------------------------------------------------------------------------------------------------------------------------------------------------------------------|

Alexa Fluor647 (Abcam, AB150111, 1:500), donkey anti-rat Alexa Fluor647 (Abcam, AB150155, 1:500), goat anti-rabbit Alexa Fluor647 (Invitrogen, A21244, 1:500)

## Validation

mouse anti- $\beta$ -catenin (1:100, DSHB, N27A1): DSHB website states positive tested species reactivity and lists Immunohistochemistry under recommended applications.  
 at anti-E-cadherin (1:50, DSHB, DCAD2): DSHB website states positive tested species reactivity and lists immunohistochemistry under recommended applications.  
 rabbit anti-GFP (1:200, Thermo Fisher, G10362): Thermo Fisher website lists publications for tested reactivity and tested immunohistochemistry applications.  
 rat anti-RFP (1:20, gift from H. Leonhardt, Chromotek 5F8): Chromotek website states tested reactivity and tested immunohistochemistry application.  
 mouse anti- $\beta$ -gal (1:1000, Promega Z378B): Promega website states tested reactivity and tested immunohistochemistry application.  
 mouse anti-Eya (1:100, DSHB eya10H6): DSHB website states positive tested species reactivity and lists Immunohistochemistry under recommended applications.  
 rabbit anti-pMad (1:200, abcam ab52903): Abcam website states tested predicted reactivity and tested immunohistochemistry application.

## Animals and other research organisms

Policy information about [studies involving animals](#); [ARRIVE guidelines](#) recommended for reporting animal research, and [Sex and Gender in Research](#)

## Laboratory animals

This study worked with *Drosophila melanogaster*. Using females of age 2-5 days and male pupae.  
 Used fly lines (genotype, source):  
 w[118] , David Bilder  
 hsflp[1] , BDSC 6  
 hsflp[122] , Iswar Hariharan  
 act>y[+]>-GAL4,UAS-RFP/TM6c , BDSC 30558  
 act>y[+]>-GAL4,UAS-GFP/TM6b , Bruce A. Edgar  
 FRT42D ubi-eGFP/CyO , BDSC 5626  
 Act5C.GAL4 (FRT.CD2), UASp-UtrABD-eGFP /TM6c , BDSC 4780 & Katja Röper (recombined in this study)  
 tubGAL80[ts]-20; TM2/TM6b , BDSC 7019  
 Sco/CyO; tub-GAL80[ts]-7 , BDSC 7018  
 c306-GAL4 , BDSC 3743  
 tj-GAL4, Mef2-GAL80/CyO , Sally Horne-Badovinac  
 tj-GAL4, UAS-CD8tom/CyO; UAS-dcr2/TM6C , David Bilder  
 MTD-GAL4 (Otu-Gal4::VP16;nos-GAL4;nos-GAL4::VP16) , BDSC 31777  
 mirr-GAL4/TM3, Sb[1] , BDSC 29650  
 tub-GAL80[ts]-20/CyO; fru-GAL4/TM6(hu) , Vincent Mirouse  
 matalpha-GAL-VP16 , BDSC 7063  
 GR1-Gal4 , BDSC 36287  
 PG150-GAL4/FM7a , Kim McCall  
 UASp-UtrABD-eGFP , Thomas Lecuit  
 UAS-upd1 / CyO,ubi-GFP , Martin Zeidler  
 UAS-DI RNAi (GLO00520) , BDSC 36784  
 UAS-hts-mCherry , BDSC 66171  
 UAS-eya , BDSC 5675  
 UAS-eya RNAi (HMS04515) , BDSC 57314  
 FRT42D shg [R69b]/ SM6b, cn#1 , Ulrich Tepass  
 UAS-shg RNAi (HMS00693) , BDSC 32904  
 UAS-shg RNAi (GLO0646) , BDSC 38207  
 UAS-CadN RNAi (1093/GD) , VDRC1093  
 UAS-hpo , Barry Thompson  
 UAS-GFP (S56T) /CyO , BDSC 1521  
 UAS-mCD8::RFP , BDSC 32219  
 UAS-egfr $\lambda$ top , BDSC 59843

## Wild animals

This study did not involve wild animals.

## Reporting on sex

As we studied mainly oogenesis, the findings of this study apply to females only.

## Field-collected samples

This study did not involve samples collected in the field.

## Ethics oversight

No ethical approval and guidance is necessary for research using *Drosophila melanogaster*.

Note that full information on the approval of the study protocol must also be provided in the manuscript.
